# Supplementary material for: Distribution of the Order Lampriformes in the Mediterranean Sea with Notes on Their Biology, Morphology, and Taxonomy
Source: MDPI journal article supplement (doi:10.3390/biology11101534), 2022-10-19
Supplement: s1 [file s1]

**Supplementary Table S1.** Coding sequences of mt-COI from 21 Lampriformes species currently available on NCBI database used in our phylogenetic reconstruction of Lampriformes relationships.

| GenBank Accession ID | Scientific name                  | COI length (bp) |
|----------------------|----------------------------------|-----------------|
| MN123259.1           | <i>Agrostichthys parkeri</i>     | 648             |
| GU440303.1           | <i>Desmodema lorum</i>           | 652             |
| MN117725.1           | <i>Desmodema polystictum</i>     | 658             |
| BBG74528.1           | <i>Eumecichthys fiski</i>        | 516             |
| JF931925.1           | <i>Lampris australensis</i>      | 655             |
| GU992944.1           | <i>Lampris guttatus</i>          | 662             |
| MN123398.1           | <i>Lampris immaculatus</i>       | 645             |
| JF931946.1           | <i>Lampris incognitus</i>        | 655             |
| LC521832.1           | <i>Lampris megalopsis</i>        | 685             |
| MN123409.1           | <i>Lophotus cappellei</i>        | 645             |
| KR086866.1           | <i>Lophotus lacepede</i>         | 665             |
| EU366588.1           | <i>Metavelifer multiradiatus</i> | 782             |
| MN123480.1           | <i>Regalecus glesne</i>          | 645             |
| KU943114.1           | <i>Regalecus russelii</i>        | 552             |
| GU440558.1           | <i>Trachipterus altivelis</i>    | 652             |
| MT323519.1           | <i>Trachipterus arcticus</i>     | 629             |
| HQ564197.1           | <i>Trachipterus jacksonensis</i> | 652             |
| OM527150.1           | <i>Trachipterus trachipterus</i> | 652             |
| GU673640.1           | <i>Velifer hypselopterus</i>     | 652             |
| MT323474.1           | <i>Zu cristatus</i>              | 632             |
| MN123529.1           | <i>Zu elongatus</i>              | 651             |
